# Supplementary material
Source: PubMed Central journal article supplement (PMC2637154)

# S2

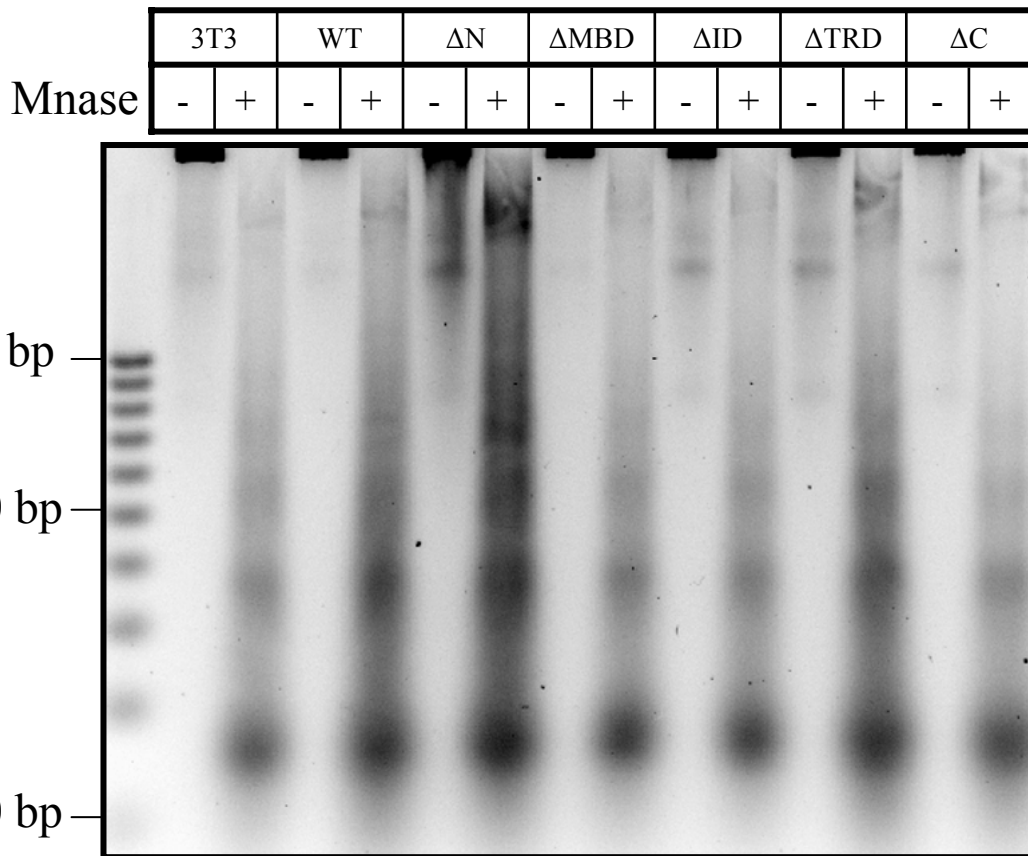

Supplement: NIHMS90201-supplement-Sup_2.pdf [file NIHMS90201-supplement-Sup_2.pdf]

# S4

WT

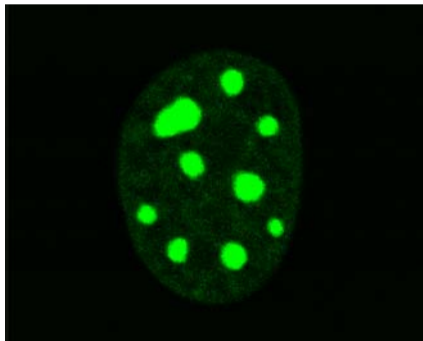

R168X

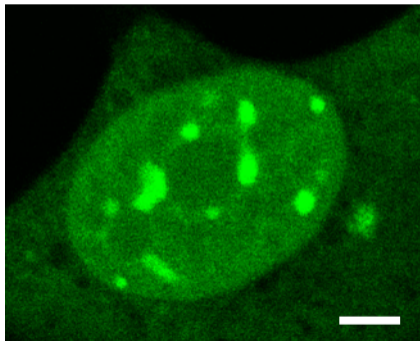

Supplement: NIHMS90201-supplement-Supplemental_4.pdf [file NIHMS90201-supplement-Supplemental_4.pdf]

# S3

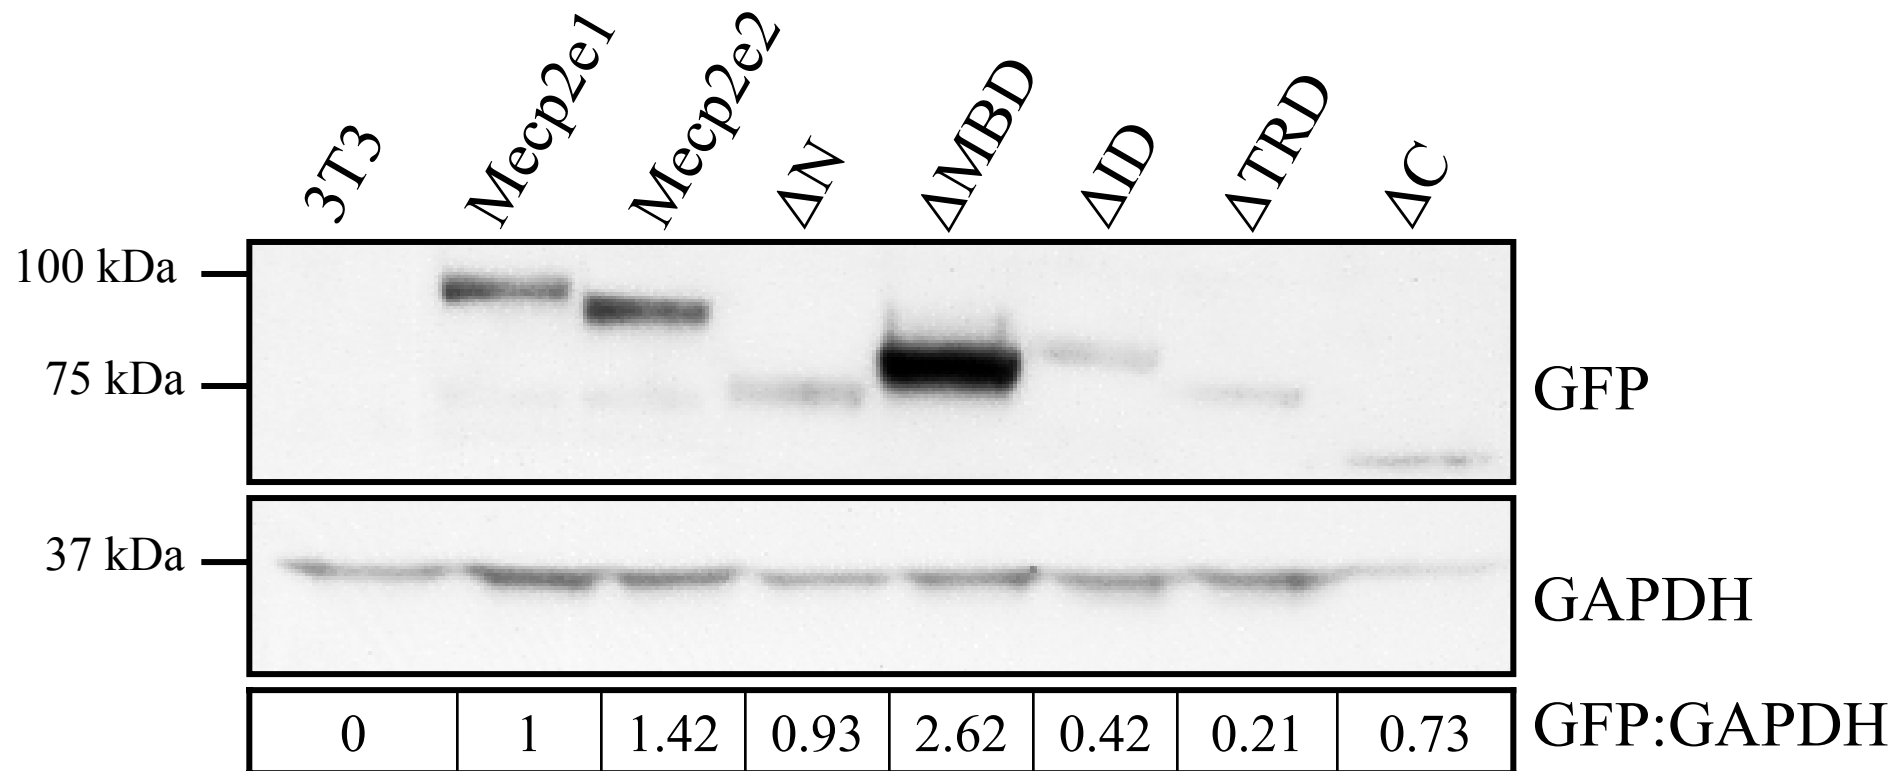

Supplement: NIHMS90201-supplement-Supplementary.pdf [file NIHMS90201-supplement-Supplementary.pdf]

**S1A**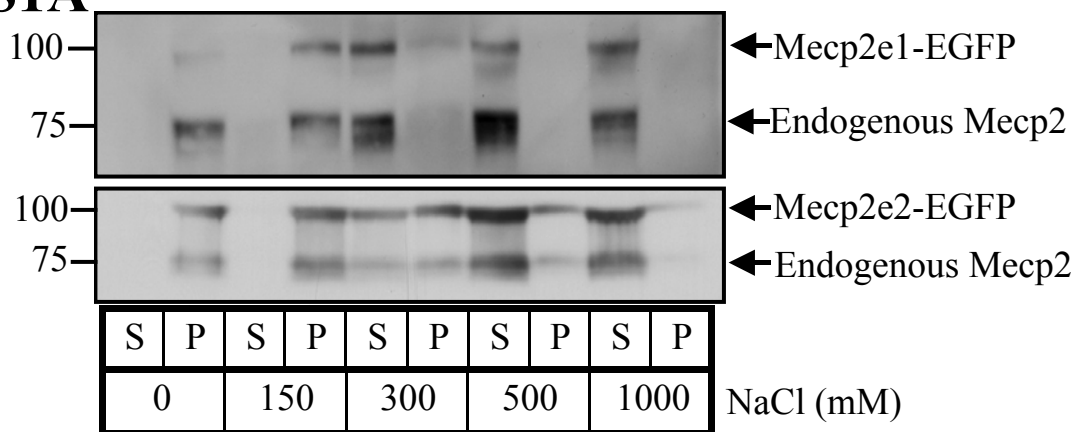**S1B**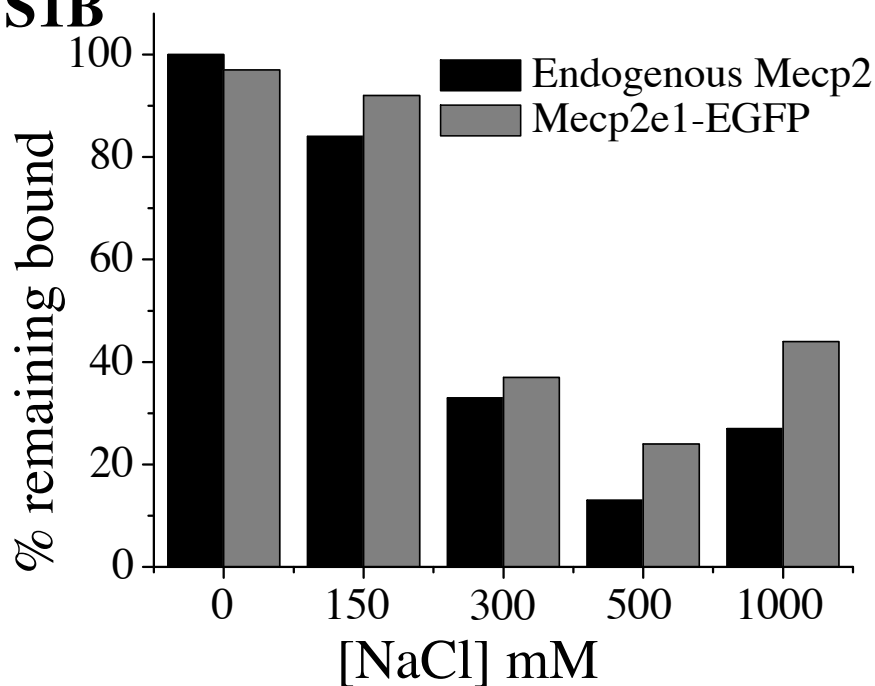**S1C**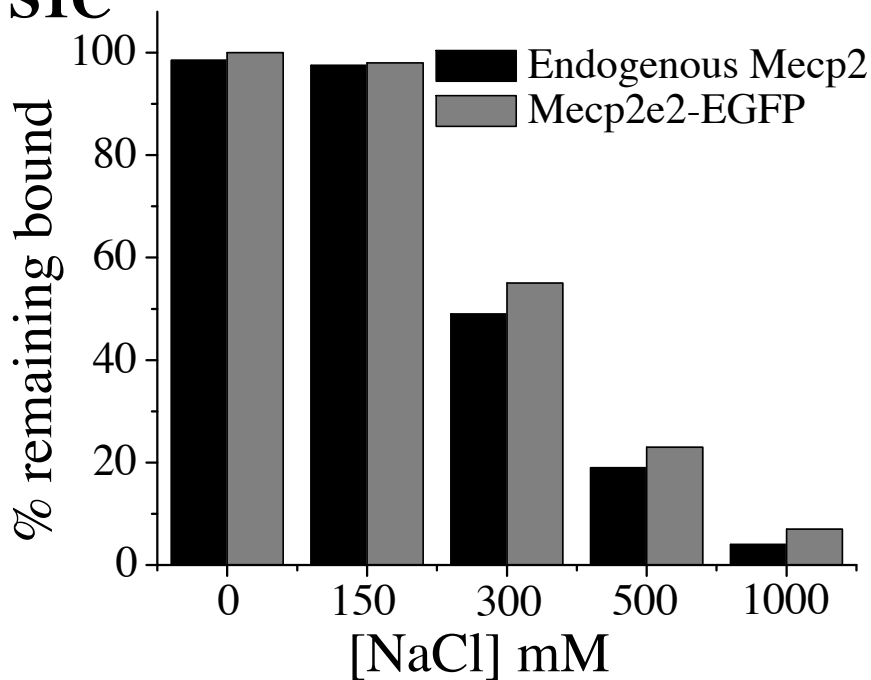

Supplement: NIHMS90201-supplement-supplentatary.pdf [file NIHMS90201-supplement-supplentatary.pdf]
